# Supplementary material
Source: PubMed Central journal article supplement (PMC6520222)

Ext. Data Fig. 1d

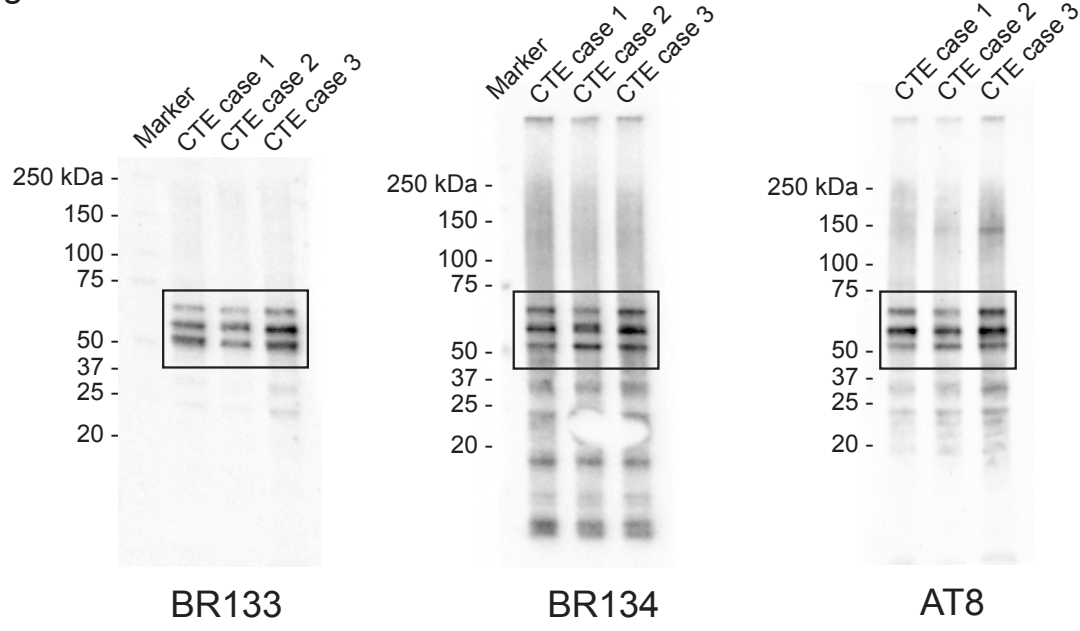

Ext. Data Fig. 2a

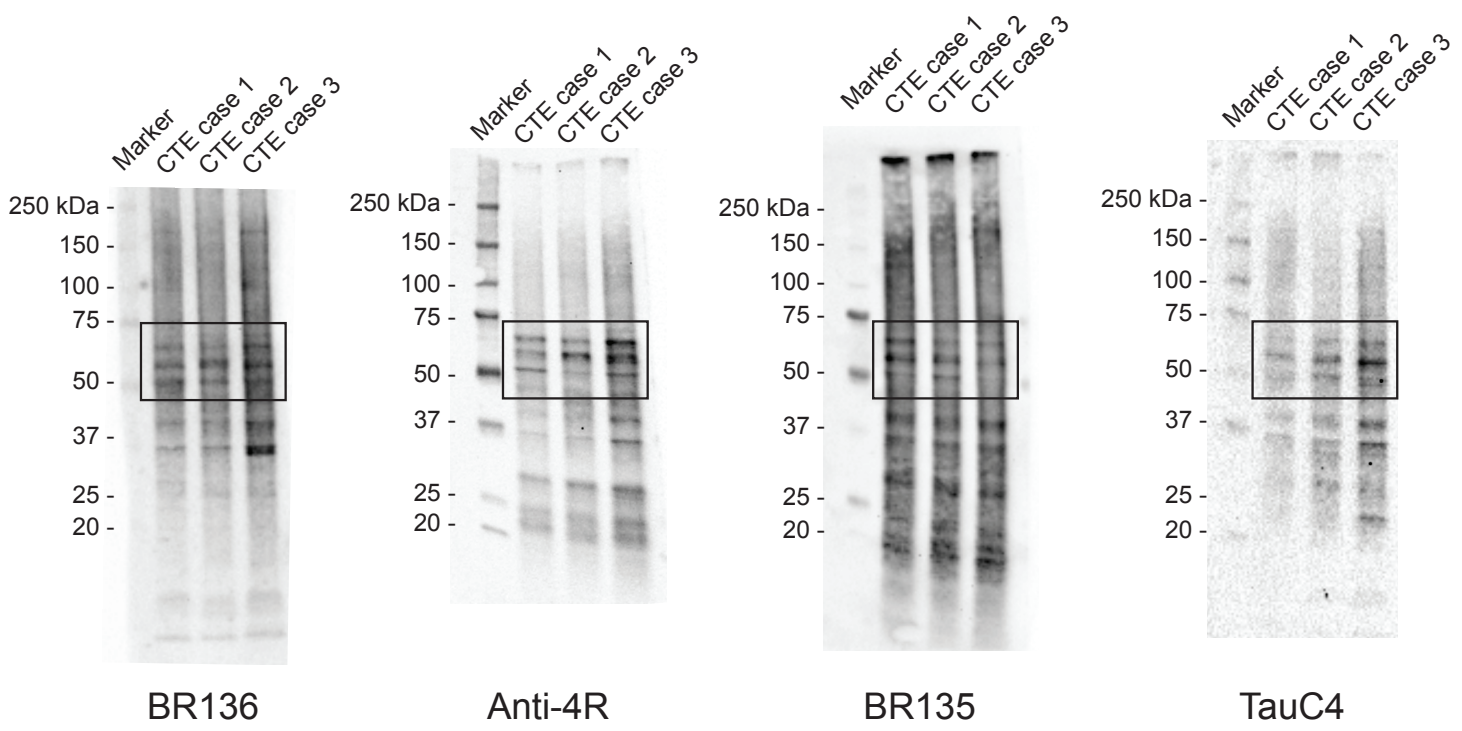

Supplement: EMS81918-supplement-Supplementary_figure.pdf [file EMS81918-supplement-Supplementary_figure.pdf]
